# Supplementary material for: Structure-Function Relationships in Temperature Effects on Bacterial Luciferases: Nothing Is Perfect
Source: MDPI journal article supplement (doi:10.3390/ijms23158119), 2022-07-23
Supplement: s1 [file s1]

# Structure-Function Relationships in Temperature Effects on Bacterial Luciferases: Nothing Is Perfect

Anna A. Deeva <sup>1</sup>, Albert E. Lisitsa <sup>1</sup>, Lev A. Sukovatyi <sup>1</sup>, Tatiana N. Melnik <sup>2</sup>, Valentina A. Kratasyuk<sup>1,3</sup>, and Elena V. Nemtseva<sup>1,3</sup>

<sup>1</sup>Biophysics Department, Siberian Federal University, Krasnoyarsk, Russia

<sup>2</sup>Institute of Protein Research, Russian Academy of Sciences, Pushchino, Moscow Region, Russia

<sup>3</sup>Institute of Biophysics, Siberian Branch of Russian Academy of Sciences, Krasnoyarsk, Russia

## Supplementary Material

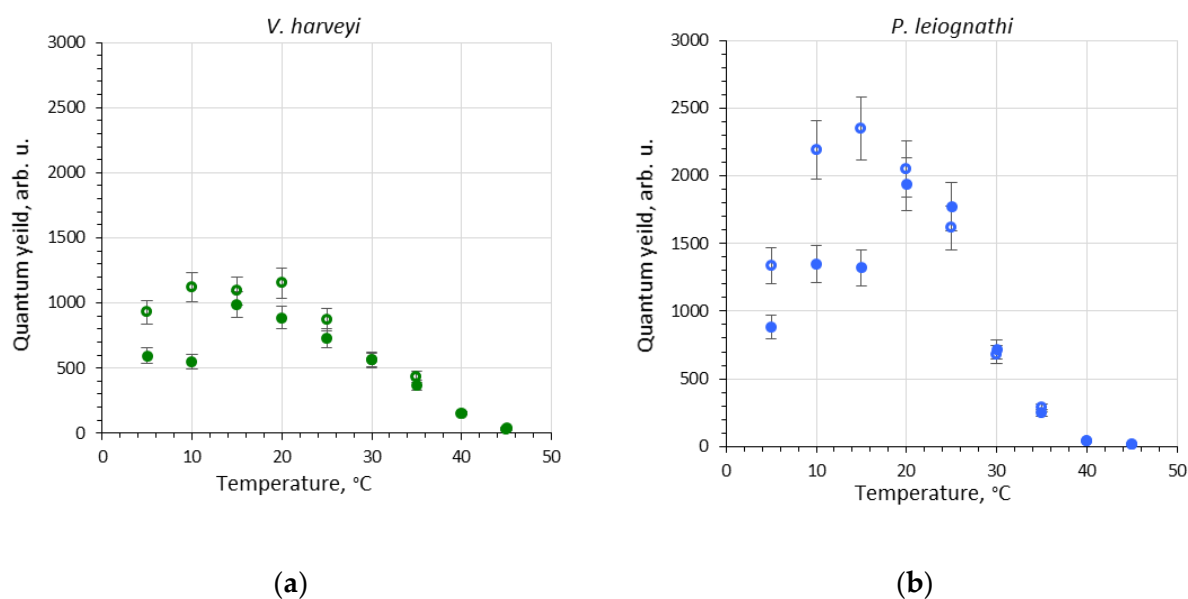

**Figure S1.** The dependence of total quantum yield of a single turnover,  $Q^*$ , of luciferases from *V. h rveyi* (a) and *P. leiognathi* (b) on temperature in the buffer (empty circles) and sucrose solution (filled circles).

**Table S1.** Structural parameters of *V. harveyi* and *P. leiognathi* luciferases at different temperatures: the root-mean-square deviation of the backbone atoms (RMSD), the radius of gyration ( $R_g$ ), and the solvent accessible surface area (SASA). Each parameter was calculated for the last 10 ns of three MD-trajectories. Data presented are the average  $\pm$  standard deviation.

| Parameter                           | Type of luciferase   | 5 °C           | 15 °C          | 27 °C          |                | 45 °C          | 60 °C          |                |
|-------------------------------------|----------------------|----------------|----------------|----------------|----------------|----------------|----------------|----------------|
|                                     |                      | Water          | Water          | Water          | 30% Sucrose    | Water          | Water          | 30% Sucrose    |
| RMSD, Å                             | <i>V. harveyi</i>    | 1.7 $\pm$ 0.2  | 1.8 $\pm$ 0.1  | 1.7 $\pm$ 0.1  | 1.6 $\pm$ 0.2  | 2.2 $\pm$ 0.1  | 2.3 $\pm$ 0.3  | 2.1 $\pm$ 0.3  |
|                                     | <i>P. leiognathi</i> | 2.2 $\pm$ 0.2  | 2.2 $\pm$ 0.2  | 2.2 $\pm$ 0.2  | 1.9 $\pm$ 0.2  | 2.6 $\pm$ 0.2  | 2.6 $\pm$ 0.5  | 2.4 $\pm$ 0.2  |
| $R_g$ , Å                           | <i>V. harveyi</i>    | 26.6 $\pm$ 0.1 | 26.6 $\pm$ 0.1 | 26.7 $\pm$ 0.1 | 26.7 $\pm$ 0.1 | 26.8 $\pm$ 0.1 | 26.8 $\pm$ 0.1 | 26.7 $\pm$ 0.1 |
|                                     | <i>P. leiognathi</i> | 27.0 $\pm$ 0.1 | 27.1 $\pm$ 0.2 | 26.8 $\pm$ 0.1 | 27.0 $\pm$ 0.1 | 27.1 $\pm$ 0.1 | 27.1 $\pm$ 0.2 | 27.2 $\pm$ 0.2 |
| SASA $\times 10^2$ , Å <sup>2</sup> | <i>V. harveyi</i>    | 287 $\pm$ 5    | 284 $\pm$ 4    | 286 $\pm$ 4    | 287 $\pm$ 4    | 288 $\pm$ 5    | 290 $\pm$ 7    | 286 $\pm$ 4    |
|                                     | <i>P. leiognathi</i> | 298 $\pm$ 4    | 300 $\pm$ 12   | 293 $\pm$ 5    | 294 $\pm$ 3    | 295 $\pm$ 6    | 297 $\pm$ 7    | 301 $\pm$ 8    |

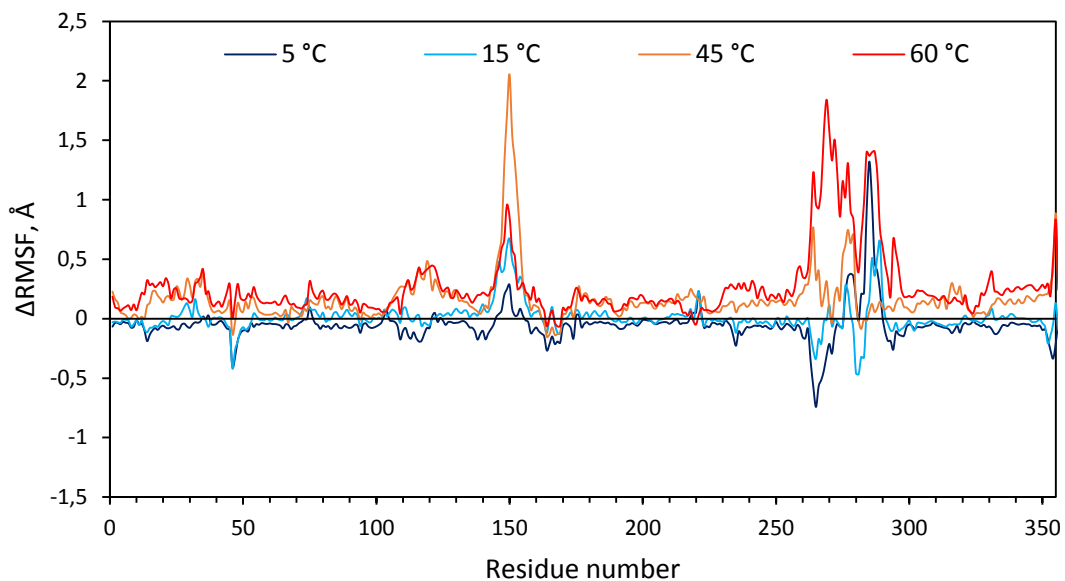

(a)

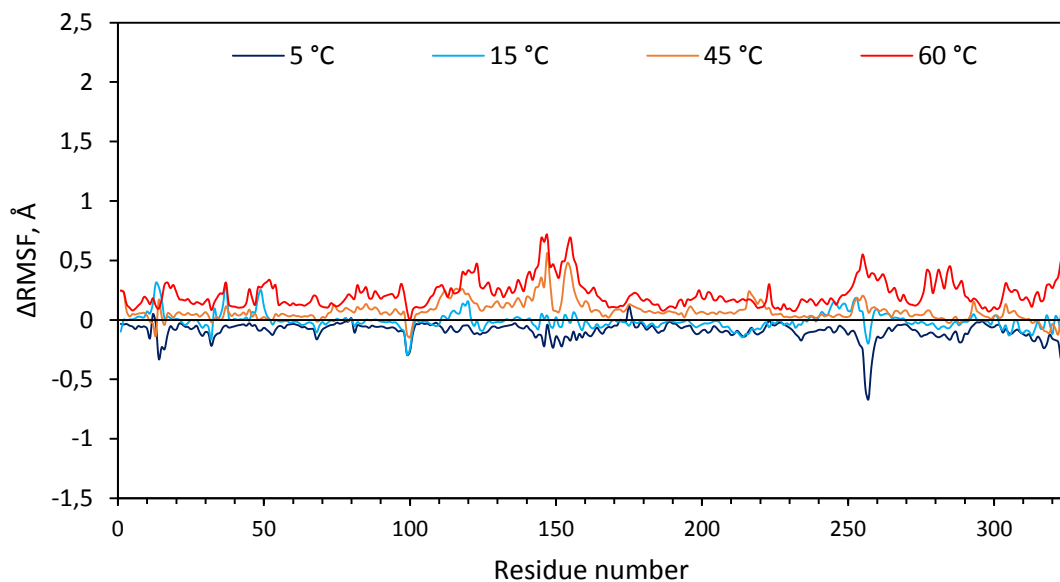

(b)

**Figure S2.**  $\Delta\text{RMSF}$  of  $\text{C}_\alpha$  atoms in the  $\alpha$ -subunit (a) and the  $\beta$ -subunit (b) of *V. harveyi* luciferase in water at different temperatures. The positive value of  $\Delta\text{RMSF}$  corresponds to a more flexible segment, as compared with the structure in water at 27 °C, while the negative  $\Delta\text{RMSF}$  corresponds to a more rigid segment.

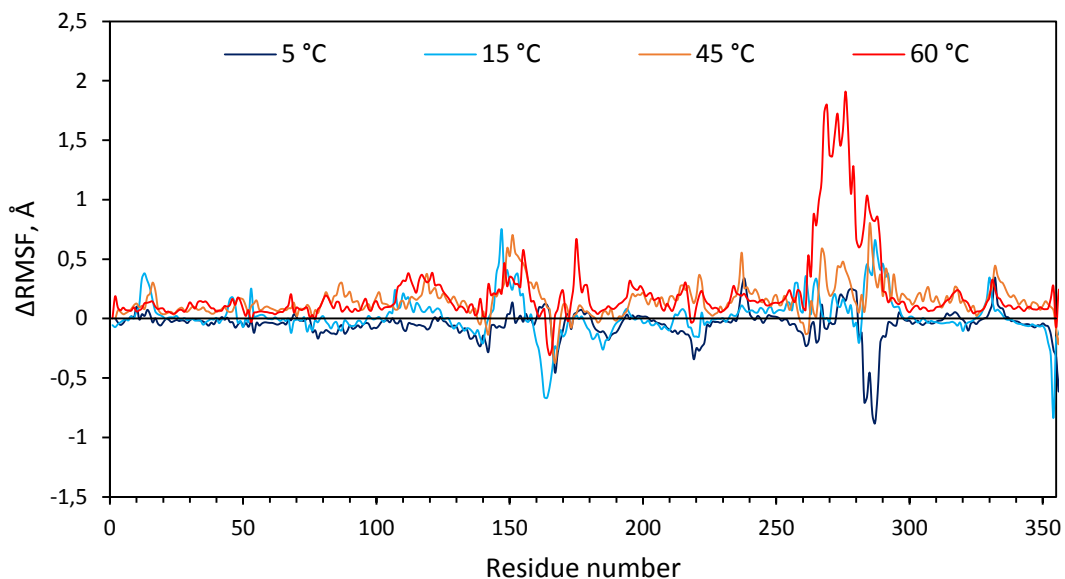

(a)

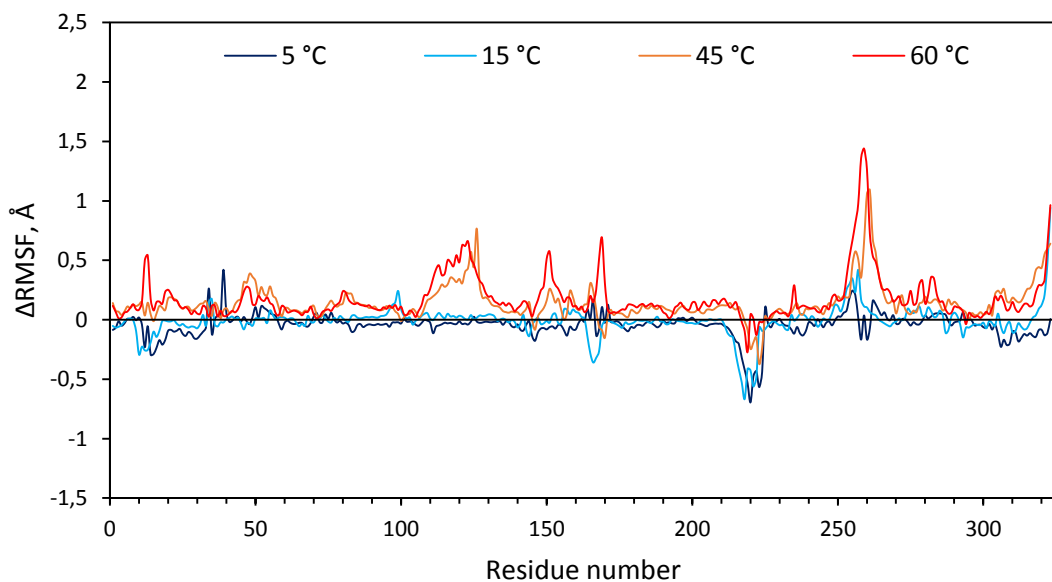

(b)

**Figure S3.**  $\Delta$ RMSF of  $C_{\alpha}$  atoms in the  $\alpha$ -subunit (a) and the  $\beta$ -subunit (b) of *P. leiognathi* luciferase in water at different temperatures. The positive value of  $\Delta$ RMSF corresponds to a more flexible segment, as compared with the structure in water at 27 °C, while the negative  $\Delta$ RMSF corresponds to a more rigid segment.

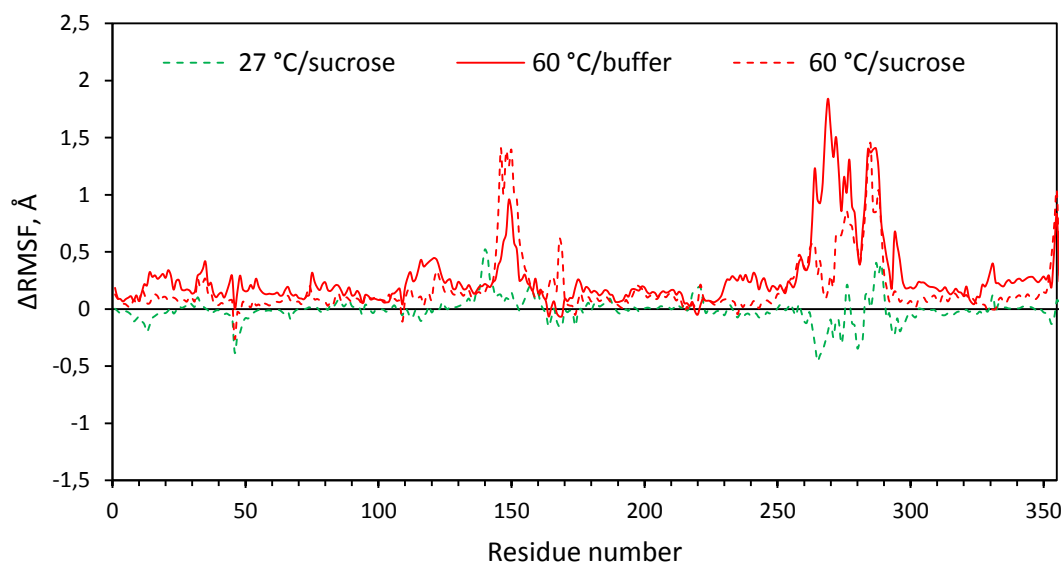

(a)

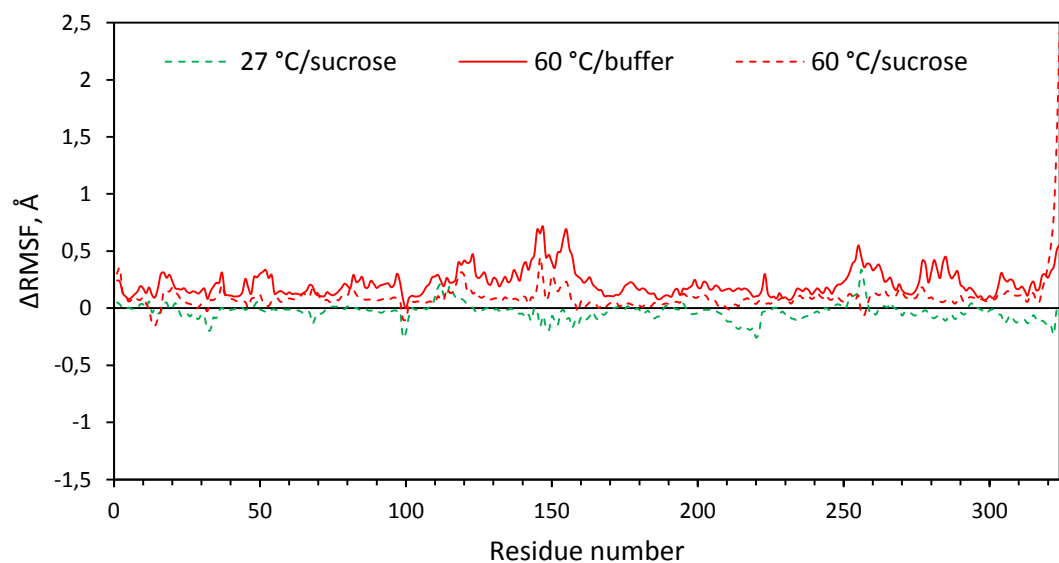

(b)

**Figure S4.**  $\Delta$ RMSF of  $C_{\alpha}$  atoms in  $\alpha$ -subunit (a) and  $\beta$ -subunit (b) of *V. harveyi* luciferase in water-sucrose (30%) at different temperatures. The positive value of  $\Delta$ RMSF corresponds to a more flexible segment, as compared with the structure in water at 27 °C, while the negative  $\Delta$ RMSF corresponds to a more rigid segment.

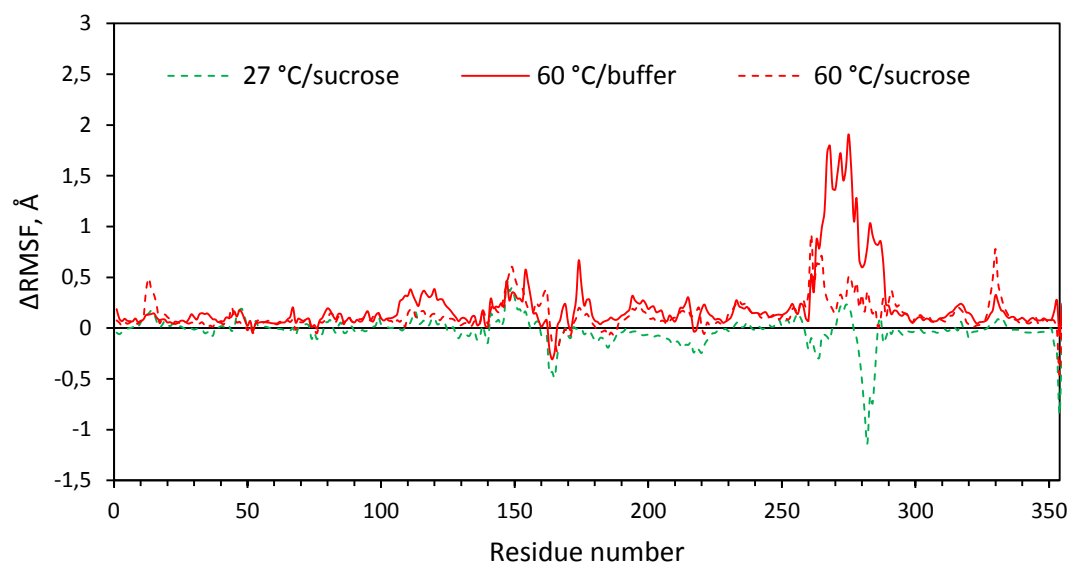

(a)

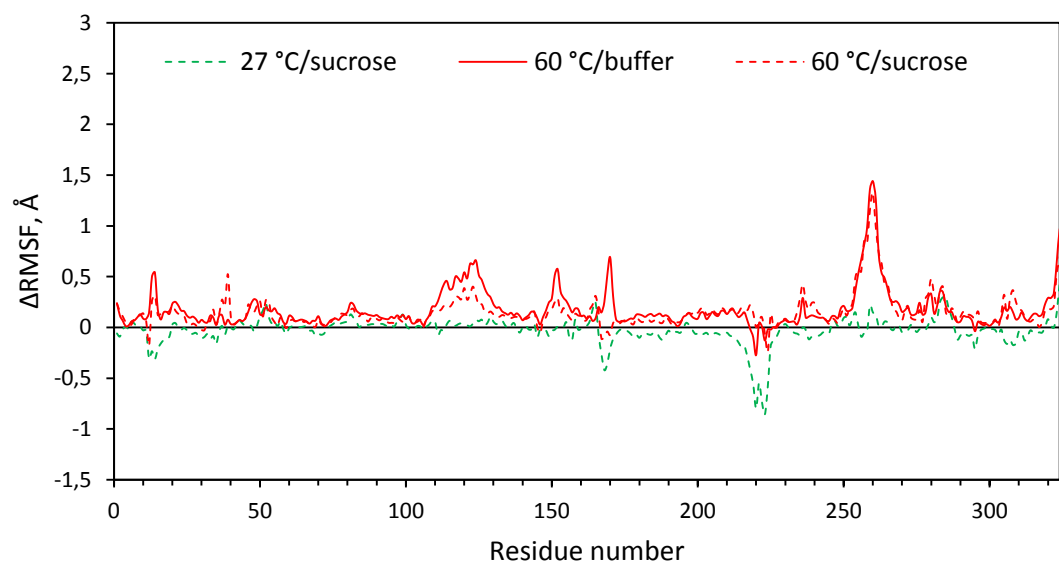

(b)

**Figure S5.**  $\Delta$ RMSF of  $C_{\alpha}$  atoms in  $\alpha$ -subunit (a) and  $\beta$ -subunit (b) of *P. leiognathi* luciferase in water-sucrose (30%) at different temperatures. The positive value of  $\Delta$ RMSF corresponds to a more flexible segment, as compared with the structure in water at 27 °C, while the negative  $\Delta$ RMSF corresponds to a more rigid segment.

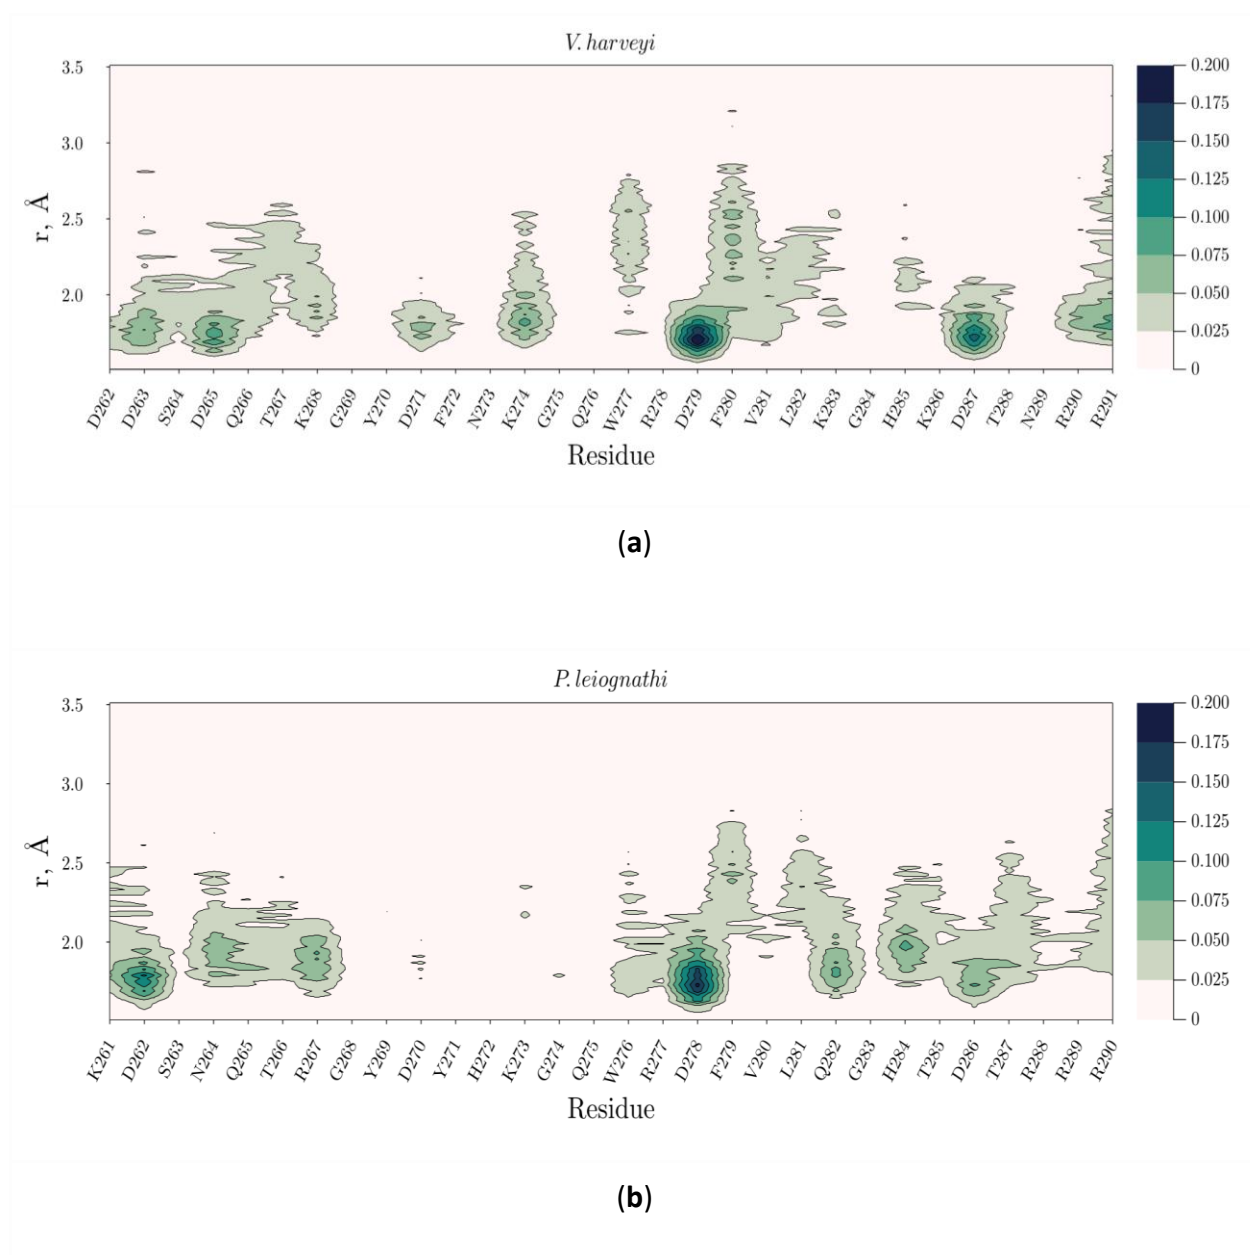

**Figure S6.** The density map of sucrose molecules near the mobile loop residues of *V. harveyi* (a) and *P. leiognathi* (b) luciferases at 27 °C during simulation time. The intensity of the green color indicates the probability of sucrose appearance in the distance  $r$  from the residue.

**Table S2.** Correlation Coefficients between  $\Delta$ RMSF profiles of *V. harveyi* and *P. leiognathi* mobile loops at different temperatures.

| 5 °C  | 15 °C | 45 °C | 60 °C | 27 °C/sucrose | 60 °C/sucrose |
|-------|-------|-------|-------|---------------|---------------|
| -0,52 | 0,69  | -0,27 | 0,67  | 0,12          | -0,22         |
